# Supplementary material for: Feeding High-Fat Diet Accelerates Development of Peripheral and Central Insulin Resistance and Inflammation and Worsens AD-like Pathology in APP/PS1 Mice
Source: MDPI journal article supplement (doi:10.3390/nu15173690), 2023-08-23
Supplement: s1 [file s1]

Supplementary data

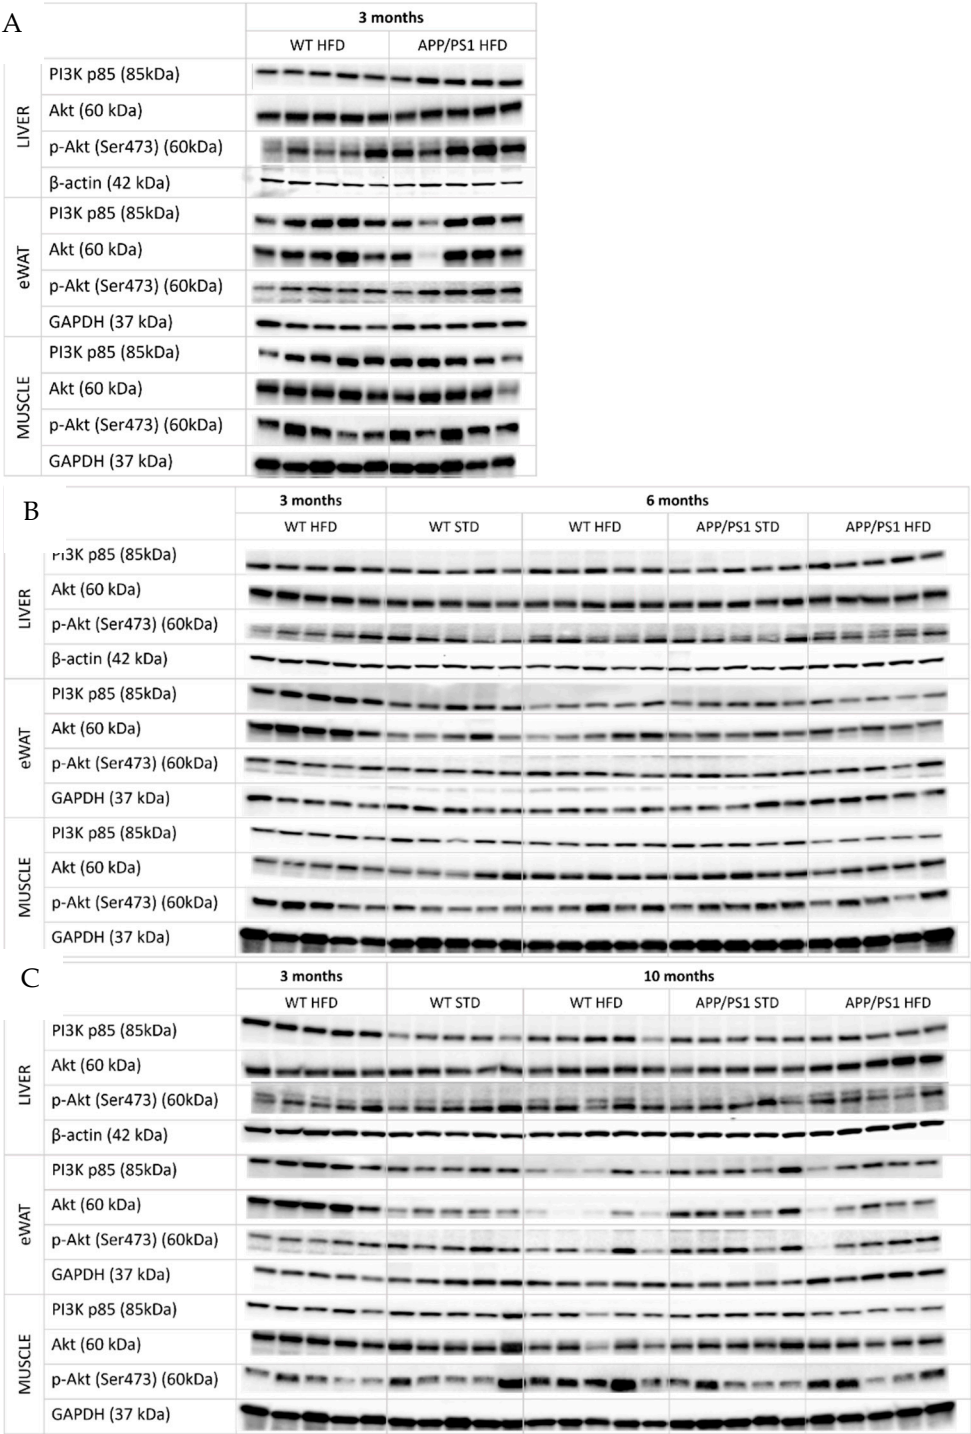

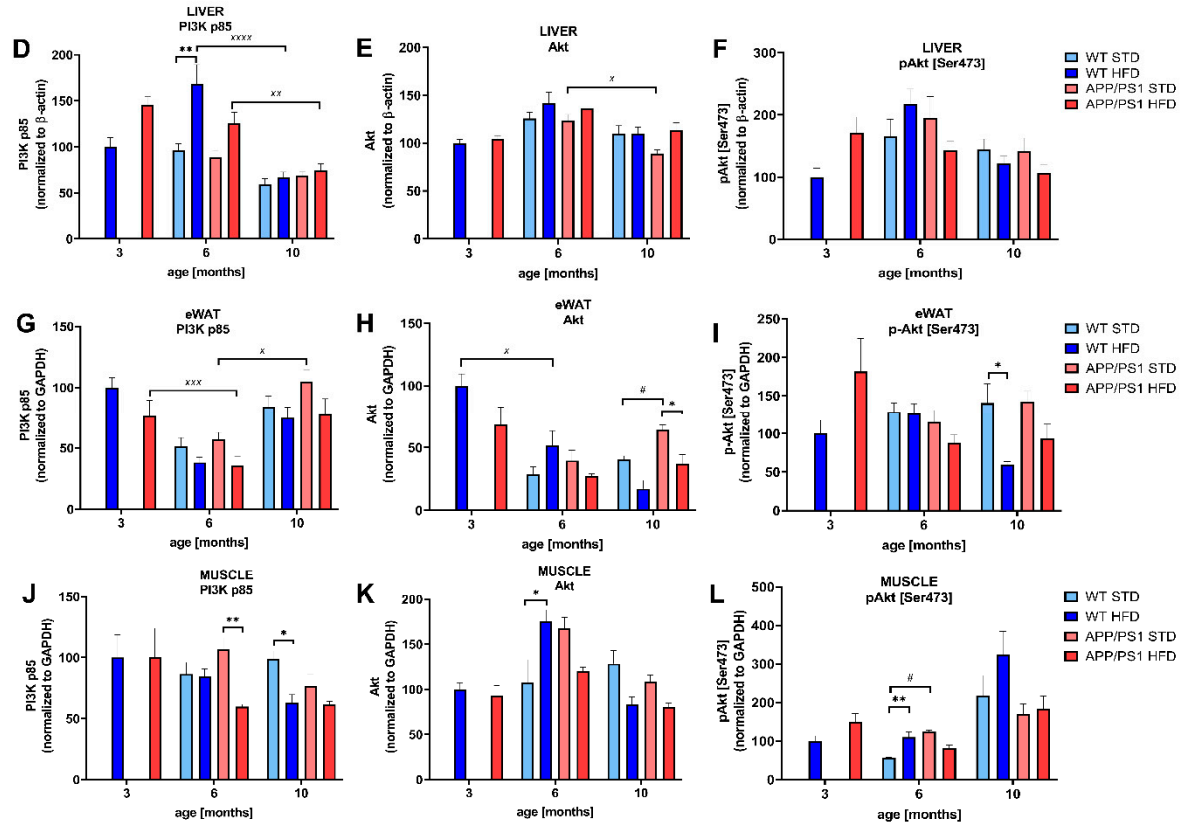

**Figure S1:** HFD reduced the PI3K/AKT signaling pathway in liver, eWAT and muscle. Proteins were determined by western blotting. Immunoblots in (A) 3 months, (B) 6 months and (C) 10 months of age, (D-L) quantification of protein levels: (D) PI3K p85 (E) Akt and (F) p-Akt (Ser473) in the liver, (G) PI3K p85 (H) Akt and (I) p-Akt (Ser473) in eWAT, (J) PI3K p85 (K) Akt and (L) p-Akt (Ser473) in the skeletal muscle. Percentage of the stained area is expressed as a % of 3-month-old WT on HFD to enable the comparison of multiple staining series. The data are presented as the means  $\pm$  SEM. Statistical analysis is made by one-way ANOVA with Bonferroni post-hoc test ( $n = 5-8$  mice per group). The significance of changes induced by diet \* $p < 0.05$ , \*\* $p < 0.01$ , by age \* $p < 0.05$ , xx $p < 0.01$ , xxx $p < 0.001$ , xxxx $p < 0.0001$ , by genotype # $p < 0.05$ .

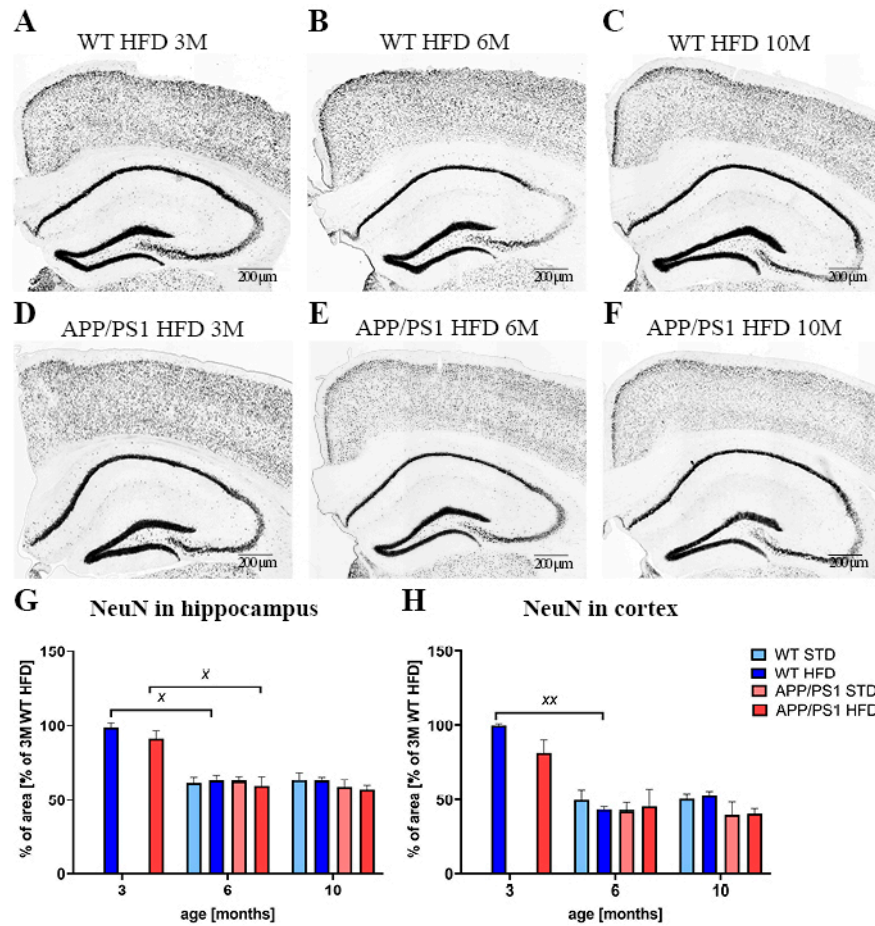

**Figure S2: Decreased neuronal density with age of mice.** Representative photomicrographs of the WT mice fed with HFD in (A) 3 months, (B) 6 months and (C) 10 months of age and APP/PS1 mice fed with HFD in (D) 3 months, (E) 6 months and (F) 10 months immunohistochemically stained with neuronal marker NeuN, and their quantification (G,H). Percentage of the stained area is expressed as a % of the 3-month-old WT mice on HFD to enable the comparison of multiple staining series. The data are presented as the means  $\pm$  SEM. Statistical analysis is made by one-way ANOVA with Bonferroni post-hoc test ( $n = 5-8$  mice per group). The significance of changes induced by age  $^*p < 0.05$ ,  $^{**}p < 0.01$ .

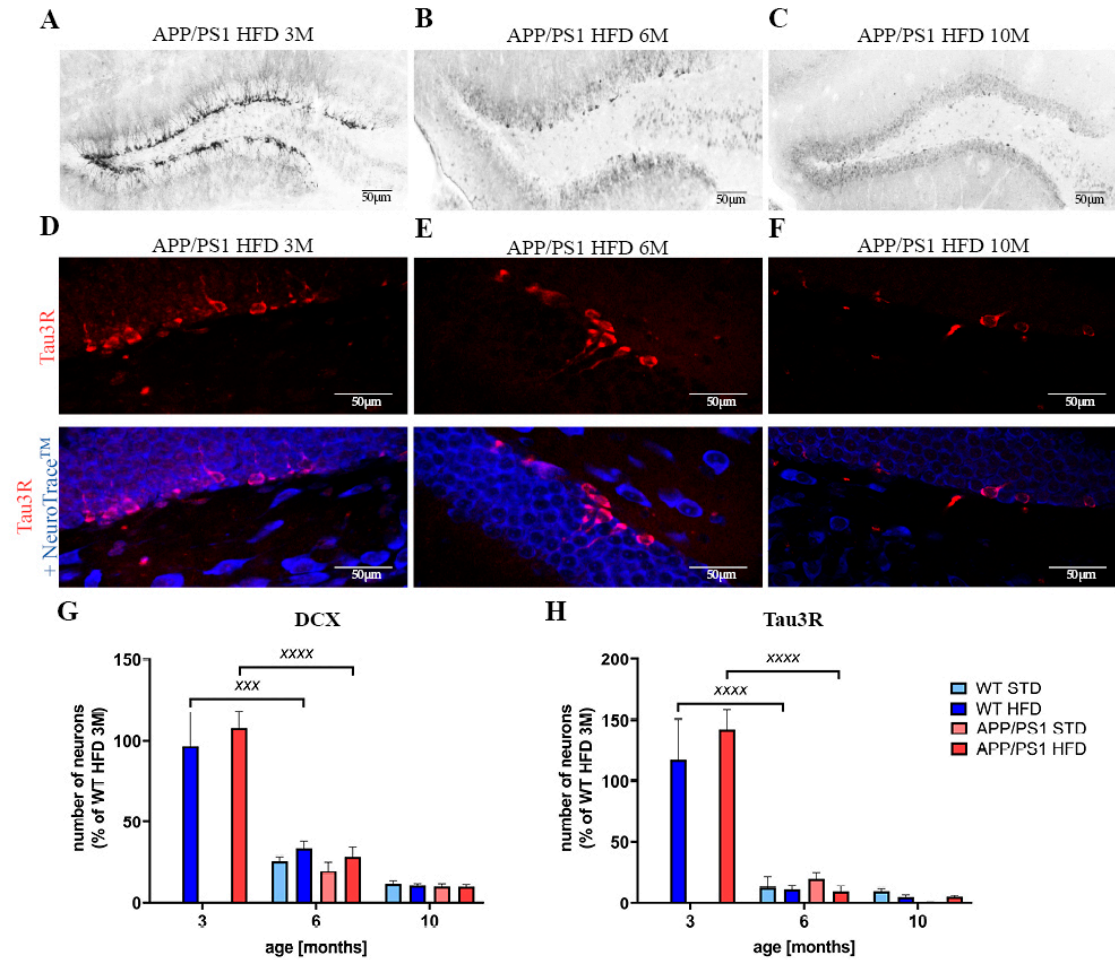

**Figure S3:** Decreased neurogenesis in mice with age. Representative photomicrographs of the APP/PS1 mice fed with HFD in (A,D) 3 months (B,E) 6 months and (C,F) 10 months of age immunohistochemically stained either for (A-C) doublecortin (DCX), or for (D-F) double staining **Tau3R** and **NeuroTrace™**. Percentage of the stained area is expressed as a % of the 3-month-old WT mice on HFD to enable the comparison of multiple staining series. The data are presented as the means  $\pm$  SEM. Statistical analysis is made by one-way ANOVA with Bonferroni post-hoc test ( $n = 5-8$  mice per group). The significance of changes induced by age  $^{xxx}p < 0.001$ ,  $^{xxxx}p < 0.0001$ .

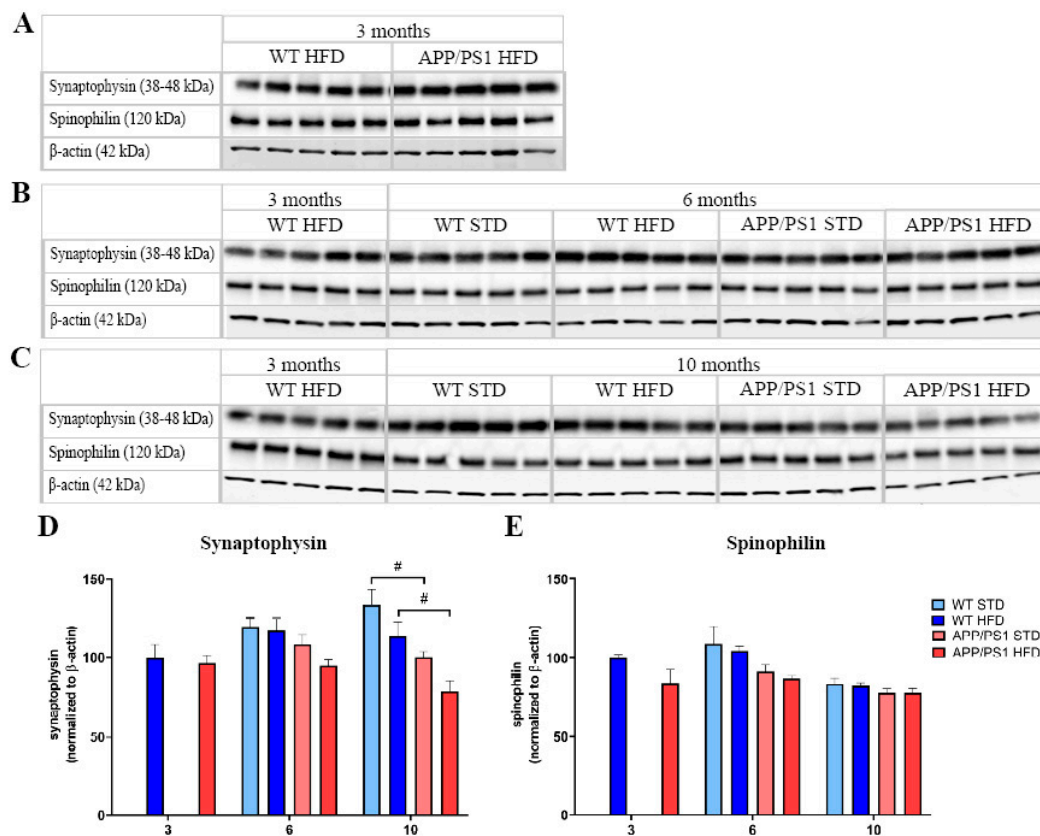

**Figure S4:** HFD decreased synaptogenesis in the hippocampi. Markers were determined by western blotting. Immunoblots in (A) 3 months, (B) 6 months and (C) 10 months of age, (D-E) quantification of protein levels: (D) synaptophysin (E) spinophilin. The data are presented as the means  $\pm$  SEM. Statistical analysis is made by one-way ANOVA with Bonferroni post-hoc test ( $n = 5-8$  mice per group). The significance of changes induced by genotype  $^{\#}p < 0.05$ .

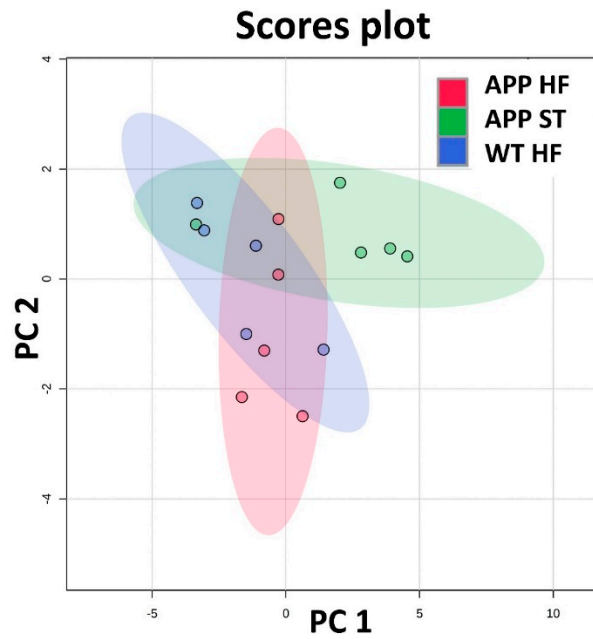

**Figure S5:** PCA score plot based on frontal cortex lipid profiling of WT and APP/PS1 mice on HFD or STD at the age of 10 months.

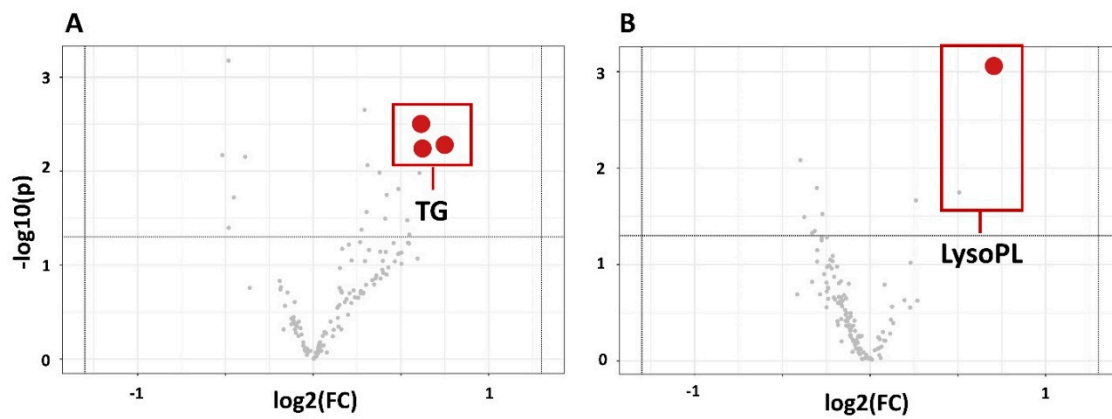

**Figure S6:** HFD upregulated TGs in the frontal cortex of APP/PS1 mice. Volcano plot of lipids from frontal cortex of APP/PS1 mice on HFD in comparison to STD (A), APP mice on HFD in comparison to WT mice on HFD (B). Statistical analysis is made between groups by Student's t-test,  $*p < 0.05$  ( $n = 5$  mice per group). **TG** – **different species of triacylglycerols**, **LysoPL** – lysophosphatidylethanolamine (18:0).

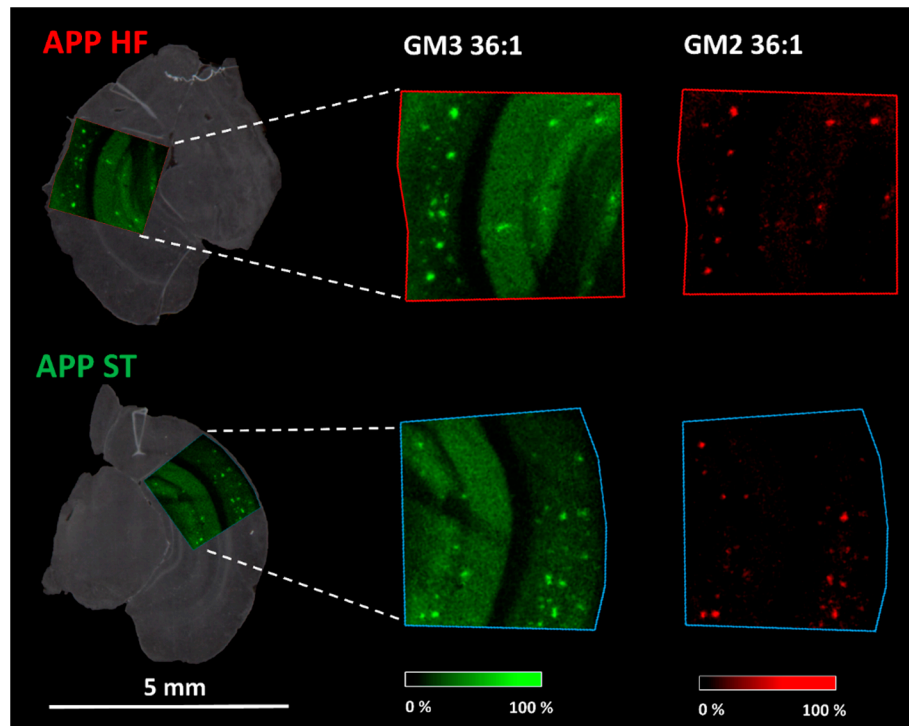

**Figure S7:** MALDI MSI analysis of APP/PS1 mice on HFD and STD at the age of 10 months. Optical image of coronal brain tissue section with measurement region. Ion images of gangliosides (GM3 36:1,  $m/z$  1179.7 and GM2 36:1,  $m/z$  1382.7) were obtained in negative ion mode ( $[M - H]^-$ ) at spatial resolution 15  $\mu\text{m}$ .



**Table S1:** List of antibodies and their appropriate dilution used for western blotting.

| Antibody                             | Manufacturer and cat. no.                                   | Blocking | Dilution          |
|--------------------------------------|-------------------------------------------------------------|----------|-------------------|
| Akt, rabbit Ab                       | Cell Signaling Technology, Beverly, MA, USA, cat. no. 4691  | 5% milk  | 1:1 000, 5% BSA   |
| p-Akt (Ser473), rabbit Ab            | Cell Signaling Technology, Beverly, MA, USA, cat. no. 4060  | 5% milk  | 1:1 000, 5% BSA   |
| GAPDH, mouse Ab                      | Cell Signaling Technology, Beverly, MA, USA, cat. no. 97166 | 5% milk  | 1:1 000, 5% milk  |
| GLUT4, mouse Ab                      | Cell Signaling Technology, Beverly, MA, USA, cat. no. 2213  | 5% milk  | 1:1 000, 5% milk  |
| Insulin receptor $\beta$ , rabbit Ab | Cell Signaling Technology, Beverly, MA, USA, cat. no. 3025  | 5% milk  | 1:1 000, 5% BSA   |
| PI3K p85, rabbit Ab                  | Cell Signaling Technology, Beverly, MA, USA, cat. no. 4257  | 5% milk  | 1:1 000, 5% BSA   |
| PSD95, mouse Ab                      | Cell Signaling Technology, Beverly, MA, USA, cat. no. 2507  | 5% BSA   | 1:1 000, 5% BSA   |
| Synaptophysin, rabbit pAb            | Santa Cruz Biotechnology, Dallas, TX, USA, cat. no. sc-9116 | 5% milk  | 1:1 000, 5% milk  |
| Spinophilin, rabbit Ab               | Cell Signaling Technology, Beverly, MA, USA, cat. no. 14136 | 5% milk  | 1:1 000, 5% BSA   |
| $\beta$ -actin, mouse Ab             | Sigma, St. Louis, MO, USA, cat. no. A5441                   | 5% milk  | 1:10 000, 5% milk |

**Table S2:** List of antibodies and their appropriate dilution used for immunohistochemistry.

| Antibody                                       | Manufacturer and cat. no.                                                 | Dilution  |
|------------------------------------------------|---------------------------------------------------------------------------|-----------|
| AT8 (phospho-Tau pSer202 + pThr205), mouse mAb | Invitrogen/Thermo Fisher Scientific, Waltham, MA, USA, cat.no. MN1020     | 1 : 400   |
| $\beta$ -amyloid, rabbit pAb                   | Invitrogen/Thermo Fisher Scientific, Waltham, MA, USA, cat. no. 715800    | 1 : 500   |
| Doublecortin, rabbit pAb                       | Cell Signaling Technology, Beverly, MA, USA, cat. no. 4604                | 1 : 600   |
| GFAP, rabbit pAb                               | Invitrogen/Thermo Fisher Scientific, Waltham, MA, USA, cat. no. PA5-16291 | 1 : 500   |
| Iba1, rabbit mAb                               | Fujifilm Wako Pure Chemical Corporation, Osaka, Japan, cat. no. 01919741  | 1 : 2 000 |
| NeuN, rabbit pAb                               | Invitrogen/Thermo Fisher Scientific, Waltham, MA, USA, cat.no. 711054     | 1 : 250   |
| Tau-3R, mouse mAb                              | Merck Millipore, Burlington, MA, USA, cat.no. 05803                       | 1 : 200   |
| Tau 9H12 (total Tau), mouse mAb                | Generous gift from Dr. L. Buée, INSERM, Lille, France                     | 1 : 100   |

**Table S3:** HFD-induced significant metabolic changes in urine of APP/PS1 and WT mice at the age of 6 and 10 months.

| effect of diet       | 6 months           |         |                         |         | 10 months          |         |                         |         |
|----------------------|--------------------|---------|-------------------------|---------|--------------------|---------|-------------------------|---------|
|                      | WT<br>(HFD vs STD) |         | APP/PS1<br>(HFD vs STD) |         | WT<br>(HFD vs STD) |         | APP/PS1<br>(HFD vs STD) |         |
|                      | $\Delta$ [%]       | p-value | $\Delta$ [%]            | p-value | $\Delta$ [%]       | p-value | $\Delta$ [%]            | p-value |
| 1-Methylnicotinamide | <b>103.4</b>       | 0.000   | <b>159.7</b>            | 0.000   | <b>137.2</b>       | 0.000   | <b>172.9</b>            | 0.000   |
| 2-PY                 | <b>104.2</b>       | 0.000   | <b>60.7</b>             | 0.000   | <b>39.7</b>        | 0.004   | <b>67.0</b>             | 0.000   |
| Nicotinamide N-oxide | 61.6               | 0.332   | 125.8                   | 0.065   | 64.5               | 0.432   | <b>153.3</b>            | 0.024   |



|                              |       |       |       |       |       |       |       |       |
|------------------------------|-------|-------|-------|-------|-------|-------|-------|-------|
| Trigonelline                 | -7.7  | 0.927 | -10.1 | 0.873 | -25.7 | 0.013 | -21.7 | 0.028 |
| Vinylacetyl glycine          | -47.8 | 0.000 | -37.2 | 0.003 | -40.0 | 0.000 | -41.2 | 0.000 |
| N-butyryl glycine            | -46.7 | 0.000 | -39.8 | 0.000 | -30.2 | 0.000 | -34.1 | 0.000 |
| N-isovaleryl glycine         | -33.1 | 0.000 | -20.3 | 0.000 | -23.0 | 0.000 | -28.1 | 0.000 |
| Hexanoyl glycine             | -44.5 | 0.000 | -42.2 | 0.000 | -44.7 | 0.000 | -44.3 | 0.000 |
| Citrate                      | -26.9 | 0.040 | 4.2   | 0.981 | -46.1 | 0.014 | -48.8 | 0.001 |
| 2-Oxoglutarate               | -74.7 | 0.000 | -57.7 | 0.005 | -77.1 | 0.000 | -75.1 | 0.000 |
| Fumarate                     | -66.5 | 0.041 | -66.3 | 0.005 | -91.3 | 0.000 | -83.7 | 0.000 |
| Succinate                    | -7.7  | 0.808 | 64.8  | 0.001 | 15.9  | 0.810 | 6.6   | 0.981 |
| Glucose + derivatives        | 115.7 | 0.000 | 130.0 | 0.000 | 44.3  | 0.114 | 80.7  | 0.001 |
| Unidentified saccharide 1    | 145.4 | 0.017 | 204.5 | 0.008 | 28.7  | 0.992 | 192.7 | 0.109 |
| Unidentified saccharide 2    | 55.2  | 0.000 | 54.3  | 0.000 | 66.1  | 0.003 | 54.1  | 0.034 |
| Carnitine                    | 64.9  | 0.012 | 160.4 | 0.000 | 126.7 | 0.000 | 149.5 | 0.000 |
| Choline derivative           | 45.8  | 0.159 | 101.5 | 0.003 | 253.1 | 0.000 | 139.6 | 0.003 |
| Methylamine                  | -47.0 | 0.000 | -42.2 | 0.000 | -44.6 | 0.000 | -39.1 | 0.000 |
| Trimethylamine               | -17.5 | 0.622 | -65.6 | 0.000 | -47.7 | 0.001 | -57.6 | 0.000 |
| N-carbamoyl $\beta$ -alanine | 117.7 | 0.000 | 65.3  | 0.001 | 106.0 | 0.000 | 148.3 | 0.000 |
| Creatinine                   | 24.4  | 0.003 | 51.5  | 0.000 | 38.4  | 0.000 | 52.7  | 0.000 |
| Glycine                      | 34.7  | 0.031 | 69.9  | 0.000 | 34.9  | 0.097 | 40.1  | 0.048 |
| Taurine                      | -69.7 | 0.000 | -71.9 | 0.000 | -48.3 | 0.023 | -46.0 | 0.003 |
| Hippurate                    | -13.6 | 0.730 | 0.7   | 1.000 | -43.0 | 0.009 | -37.5 | 0.009 |
| Putrescine                   | -15.8 | 0.172 | -5.1  | 0.911 | -32.7 | 0.004 | -19.7 | 0.190 |
| Orotate                      | 54.1  | 0.004 | 28.3  | 0.161 | 0.4   | 1.000 | 2.5   | 0.997 |
| 2-Oxoisocaproate             | -38.6 | 0.000 | -24.6 | 0.007 | -25.7 | 0.001 | -24.8 | 0.006 |
| 3-Methyl-2-oxovalerate       | -37.4 | 0.000 | -27.1 | 0.001 | -43.7 | 0.013 | -31.0 | 0.041 |
| Pseudouridine                | -0.4  | 1.000 | 17.7  | 0.050 | 24.2  | 0.001 | 22.2  | 0.007 |
| Methanol                     | 13.0  | 0.882 | 9.2   | 0.953 | 65.7  | 0.009 | 17.6  | 0.780 |

The results are expressed as the percentage change of concentration in HFD vs. STD mice of both strains. The statistical significance was analysed by parametric ANOVA. Significant changes with  $p < 0.05$  are color-coded: significant increase in red, decrease in blue. HFD - high-fat diet, STD – standard diet, 2PY - N-Methyl-2-pyridone-3-carboxamide.

**Table S4:** Strain-induced significant metabolic changes in urine of APP/PS1 and WT mice at the age of 6 and 10 months.

| effect of strain          | 6 months        |         |                 |         | 10 months       |         |                 |         |
|---------------------------|-----------------|---------|-----------------|---------|-----------------|---------|-----------------|---------|
|                           | STD             |         | HFD             |         | STD             |         | HFD             |         |
|                           | (APP/PS1 vs WT) |         | (APP/PS1 vs WT) |         | (APP/PS1 vs WT) |         | (APP/PS1 vs WT) |         |
|                           | $\Delta$ [%]    | p-value |
| 2-PY                      | -15.6           | 0.006   | -5.2            | 0.303   | -4.5            | 0.948   | -0.6            | 0.999   |
| Unidentified saccharide 1 | 28.5            | 0.969   | 3.6             | 0.996   | -22.3           | 0.995   | -65.8           | 0.018   |
| Glucose + derivatives     | 19.2            | 0.887   | 11.8            | 0.579   | -3.8            | 0.998   | -23.1           | 0.032   |
| Creatinine                | 6.5             | 0.802   | -12.6           | 0.014   | 17.1            | 0.112   | 6.2             | 0.202   |
| Carnitine                 | 12.8            | 0.949   | -28.6           | 0.003   | -5.9            | 0.997   | -14.5           | 0.224   |
| Trimethylamine            | -35.0           | 0.014   | 56.0            | 0.118   | -9.2            | 0.875   | 12.0            | 0.915   |
| Succinate                 | 64.1            | 0.003   | -8.1            | 0.705   | -6.8            | 0.987   | 1.3             | 1.000   |

|                        |      |       |              |       |       |       |              |       |
|------------------------|------|-------|--------------|-------|-------|-------|--------------|-------|
| 3-Methyl-2-oxovalerate | -2.6 | 0.982 | -16.4        | 0.163 | -21.3 | 0.359 | <b>-35.8</b> | 0.025 |
| N-isovalerylglycine    | -2.1 | 0.956 | <b>-17.8</b> | 0.001 | -14.2 | 0.054 | -8.1         | 0.326 |

The results are expressed as the percentage change of concentration in APP/PS1 vs. WT mice on both diets. The statistical significance was analysed by parametric ANOVA. Significant changes with  $p < 0.05$  are color-coded: significant increase in **red**, decrease in **blue**. HFD - high-fat diet, STD – standard diet, 2PY - N-Methyl-2-pyridone-3-carboxamide.

**Table S5:** HFD-induced significant metabolic changes in plasma of APP/PS1 and WT mice at the age of 6 and 10 months.

| effect of diet         | 6 months           |         |                         |         | 10 months          |         |                         |         |
|------------------------|--------------------|---------|-------------------------|---------|--------------------|---------|-------------------------|---------|
|                        | WT<br>(HFD vs STD) |         | APP/PS1<br>(HFD vs STD) |         | WT<br>(HFD vs STD) |         | APP/PS1<br>(HFD vs STD) |         |
|                        | $\Delta$ [%]       | p-value | $\Delta$ [%]            | p-value | $\Delta$ [%]       | p-value | $\Delta$ [%]            | p-value |
| Glucose                | <b>36.0</b>        | 0.021   | <b>37.5</b>             | 0.004   | 4.0                | 0.986   | 25.4                    | 0.222   |
| Arabinose              | 5.5                | 0.952   | <b>36.3</b>             | 0.014   | -4.0               | 0.976   | 23.4                    | 0.174   |
| Valine                 | <b>-45.2</b>       | 0.025   | <b>-46.3</b>            | 0.008   | -17.6              | 0.310   | -22.0                   | 0.239   |
| Leucine                | -41.7              | 0.056   | <b>-45.5</b>            | 0.012   | -19.0              | 0.168   | -16.1                   | 0.416   |
| Phenylalanine          | <b>-26.4</b>       | 0.040   | <b>-24.7</b>            | 0.046   | -9.7               | 0.492   | -10.7                   | 0.420   |
| 2-Hydroxyisobutyrate   | <b>-46.3</b>       | 0.002   | -17.8                   | 0.414   | -40.0              | 0.923   | -14.8                   | 0.986   |
| 3-Hydroxyisobutyrate   | <b>-58.9</b>       | 0.001   | <b>-61.8</b>            | 0.000   | -41.9              | 0.094   | <b>-52.1</b>            | 0.044   |
| 2-Oxoisocaproate       | <b>-33.9</b>       | 0.006   | -26.2                   | 0.062   | -9.3               | 0.679   | -4.8                    | 0.952   |
| 3-Methyl-2-oxovalerate | <b>-39.0</b>       | 0.010   | -21.4                   | 0.527   | 1.5                | 1.000   | -3.3                    | 0.995   |
| Taurine                | <b>-35.2</b>       | 0.002   | -15.4                   | 0.355   | -11.8              | 0.617   | <b>-31.4</b>            | 0.021   |
| Creatine               | <b>-32.8</b>       | 0.010   | -6.4                    | 0.919   | -11.4              | 0.827   | <b>-31.6</b>            | 0.032   |
| Dimethylamine          | <b>-35.2</b>       | 0.001   | -21.8                   | 0.060   | -12.4              | 0.717   | -4.2                    | 0.986   |
| Glycine                | -4.5               | 0.965   | -10.2                   | 0.610   | -6.7               | 0.837   | <b>-23.2</b>            | 0.044   |
| Dimethylglycine        | <b>50.4</b>        | 0.007   | <b>62.9</b>             | 0.007   | -4.0               | 0.992   | 14.9                    | 0.923   |
| Glycerol               | 12.3               | 0.795   | <b>59.4</b>             | 0.008   | 25.9               | 0.343   | 17.0                    | 0.655   |

The results are expressed as the percentage change of concentration in HFD vs. STD mice of both strains. The statistical significance was analysed by parametric ANOVA. Significant changes with  $p < 0.05$  are color-coded: significant increase in **red**, decrease in **blue**. HFD - high-fat diet, STD – standard diet.

**Table S6:** Strain-induced significant metabolic changes in plasma of APP/PS1 and WT mice at the age of 6 and 10 months.

| effect of strain  | 6 months               |         |                        |         | 10 months              |         |                        |         |
|-------------------|------------------------|---------|------------------------|---------|------------------------|---------|------------------------|---------|
|                   | STD<br>(APP/PS1 vs WT) |         | HFD<br>(APP/PS1 vs WT) |         | STD<br>(APP/PS1 vs WT) |         | HFD<br>(APP/PS1 vs WT) |         |
|                   | $\Delta$ [%]           | p-value |
| Arabinose         | -3.6                   | 0.989   | <b>24.6</b>            | 0.044   | -8.7                   | 0.872   | 17.4                   | 0.194   |
| Lactate           | 40.9                   | 0.305   | 21.2                   | 0.295   | -3.3                   | 1.000   | <b>67.1</b>            | 0.023   |
| 3-Hydroxybutyrate | -23.1                  | 0.848   | -23.3                  | 0.520   | -18.3                  | 0.843   | <b>-46.1</b>           | 0.027   |
| Alanine           | 18.8                   | 0.708   | 16.9                   | 0.715   | -5.9                   | 0.990   | <b>48.7</b>            | 0.014   |

The results are expressed as the percentage change of concentration in APP/PS1 vs. WT mice on both diets. The statistical significance was analysed by parametric ANOVA. Significant changes with  $p < 0.05$  are color-coded: significant increase in **red**, decrease in **blue**. HFD - high-fat diet, STD – standard diet.

**Table S7:** HFD-induced significant metabolic changes in polar liver extracts of APP/PS1 and WT mice at the age of 10 months.

| effect of diet              | APP/PS1<br>(HFD vs STD) |         | WT<br>(HFD vs STD) |         |
|-----------------------------|-------------------------|---------|--------------------|---------|
|                             | $\Delta$ [%]            | p-value | $\Delta$ [%]       | p-value |
| Aspartate                   | -45.3                   | 0.040   | -14.5              | 0.830   |
| Glycine                     | -29.5                   | 0.004   | -11.5              | 0.553   |
| Valine                      | -23.4                   | 0.037   | -1.1               | 0.999   |
| Arabinose                   | 97.7                    | 0.013   | 85.8               | 0.092   |
| Glucose                     | 81.4                    | 0.017   | 68.5               | 0.122   |
| Glycogen                    | 357.1                   | 0.003   | 158.2              | 0.238   |
| Mannose                     | 61.5                    | 0.030   | 65.9               | 0.056   |
| Hypoxanthine                | -31.4                   | 0.001   | 2.1                | 0.996   |
| Nicotinamide                | -22.7                   | 0.027   | -0.9               | 1.000   |
| NAD <sup>+</sup>            | -34.3                   | 0.000   | -14.9              | 0.219   |
| Xanthosine                  | -28.6                   | 0.025   | -24.0              | 0.047   |
| Uridine                     | -28.7                   | 0.001   | -6.6               | 0.845   |
| Taurine                     | -31.6                   | 0.000   | -7.8               | 0.780   |
| sn-Glycero-3-phosphocholine | 172.0                   | 0.003   | 59.1               | 0.381   |
| Lactate                     | 75.0                    | 0.000   | 37.8               | 0.114   |
| Glycerol                    | -28.1                   | 0.029   | -6.9               | 0.917   |

The results are expressed as the percentage change of concentration in HFD vs. STD mice of both strains. The statistical significance was analysed by parametric ANOVA. Significant changes with  $p < 0.05$  are color-coded: significant increase in red, decrease in blue. HFD - high-fat diet, STD – standard diet, NAD - nicotinamide adenine dinucleotide.

**Table S8:** Strain-induced significant metabolic changes in polar liver extracts of APP/PS1 and WT mice at the age of 10 months.

| effect of strain | STD<br>(APP/PS1 vs WT) |         | HFD<br>(APP/PS1 vs WT) |         |
|------------------|------------------------|---------|------------------------|---------|
|                  | $\Delta$ [%]           | p-value | $\Delta$ [%]           | p-value |
| Glutamate        | -17.4                  | 0.024   | 1.8                    | 0.996   |
| Valine           | -19.0                  | 0.041   | 4.6                    | 0.966   |
| Hypoxanthine     | -11.9                  | 0.397   | 31.2                   | 0.046   |
| Lactate          | 29.0                   | 0.023   | 1.6                    | 1.000   |

The results are expressed as the percentage change of concentration in APP/PS1 vs. WT mice on both diets. The statistical significance was analysed by parametric ANOVA. Significant changes with  $p < 0.05$  are color-coded: significant increase in red, decrease in blue. HFD - high-fat diet, STD – standard diet.

**Table S9:** Upregulated liver lipids in the APP/PS1 mice on HFD at the age of 6 months identified by volcano plot.

| <b>Lipid</b>       | <b>FC</b> | <b>log2(FC)</b> | <b>raw p-value</b> | <b>-log10(p)</b> |
|--------------------|-----------|-----------------|--------------------|------------------|
| DG(16:0_18:1)      | 2.0581    | 1.0413          | 0.001728           | 2.7625           |
| TG(16:0_16:1_18:1) | 2.9308    | 1.5513          | 0.0040256          | 2.3952           |
| TG(16:0_18:1_18:2) | 2.0378    | 1.027           | 0.0040259          | 2.3951           |
| TG(20:0_16:0_18:1) | 2.639     | 1.4             | 0.0047198          | 2.3261           |
| TG(16:0_18:1_16:0) | 2.9313    | 1.5515          | 0.0047395          | 2.3243           |
| TG(18:0_17:0_18:1) | 2.3842    | 1.2535          | 0.0061069          | 2.2142           |
| TG(18:1_18:1_16:0) | 2.3603    | 1.239           | 0.0071435          | 2.1461           |
| TG(16:0_17:0_18:1) | 2.8003    | 1.4856          | 0.0071752          | 2.1442           |
| TG(18:0_18:1_18:1) | 2.0426    | 1.0304          | 0.0071999          | 2.1427           |
| TG(16:1_16:1_18:1) | 2.3593    | 1.2384          | 0.011332           | 1.9457           |
| TG(20:1_18:1_16:0) | 2.7517    | 1.4603          | 0.011479           | 1.9401           |
| TG(18:1_17:1_16:1) | 2.0755    | 1.0535          | 0.012758           | 1.8942           |
| TG(18:1_17:1_18:1) | 2.1221    | 1.0855          | 0.014064           | 1.8519           |
| TG(18:1_18:1_18:1) | 2.0195    | 1.014           | 0.015506           | 1.8095           |
| TG(16:0_18:1_20:4) | 2.0438    | 1.0313          | 0.015882           | 1.7991           |
| TG(16:0_16:1_16:1) | 2.7149    | 1.4409          | 0.015962           | 1.7969           |
| TG(20:1_18:1_20:1) | 2.5052    | 1.3249          | 0.01831            | 1.7373           |
| TG(20:1_18:1_18:1) | 2.6005    | 1.3788          | 0.01991            | 1.7009           |
| TG(16:1_16:1_18:2) | 2.0024    | 1.0018          | 0.022634           | 1.6452           |

Statistical analysis is made by Student's t-test,  $p < 0.05$ . DG – diacylglycerol, TG – triacylglycerol, FC – fold change
